# Supplementary material
Source: ML conference proceedings conference paper supplement (https://openaccess.thecvf.com/content/CVPR2023/html/Ji_Seeing_What_You_CVPR_2023_paper.html)
Supplement: Supplementary file 1 [file Ji_Seeing_What_You_CVPR_2023_supplemental.pdf]

## Supplementary

### A. Model Details

#### A.1. Model Architecture

Our model utilizes the vision encoder and text encoder to learn uni-modal representations, and the fusion encoder to conduct cross-modal interactions, respectively. The whole architecture is displayed in Fig. 5.

#### A.2. Previous Pre-training Tasks

**Contrastive Learning (CL).** We conduct CL on the global representations from vision and text encoders. Given a batch of image-text pairs, for an image (text), the paired text (image) is treated as the positive sample, and other texts (images) are negative samples. We use the InfoNCE loss as follows:

$$\begin{aligned} \text{NCE}_{V2T} &= -\frac{1}{N} \sum_{i=1}^N \log \frac{\exp(s(V_i, T_i)/\tau)}{\sum_{n=1}^N \exp(s(V_i, T_n)/\tau)}, \\ \text{NCE}_{T2V} &= -\frac{1}{N} \sum_{i=1}^N \log \frac{\exp(s(T_i, V_i)/\tau)}{\sum_{n=1}^N \exp(s(T_i, V_n)/\tau)}, \end{aligned} \quad (5)$$

where  $N$  is the batchsize and  $\tau$  serves as a learnable temperature parameter. The similarity function is formatted as cosine similarity,  $s(V, T) = \frac{\phi_v(V)^T \phi_t(T)}{\|\phi_v(V)\| \cdot \|\phi_t(T)\|}$ , where  $\phi$  is a linear projection head. The vision-text contrastive loss is defined as:

$$\mathcal{L}_{CL} = \text{NCE}_{V2T} + \text{NCE}_{T2V}. \quad (6)$$

For the video-text data, we use the mean pooling of  $M$  frame [CLS] features to denote the global representation of a video and then also use Eq. (5) for contrastive learning.

**Vision-Text Matching (VTM).** The model is required to predict whether a pair of image-text (video-text) is matched or not. Specifically, we conduct a binary classification on the concatenation of the visual and textual global features. The loss is defined as:

$$\mathcal{L}_{VTM} = \text{CE}(\phi(\text{concat}[V, T]), y), \quad (7)$$

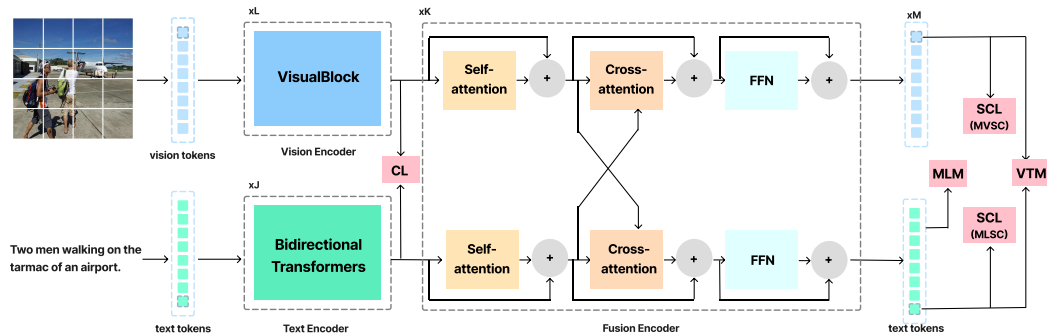

Figure 5. The whole architecture of our model.

where  $V, T$  are [CLS] features and  $y$  is the ground truth. **CE** is Cross-Entropy loss and  $\phi$  refers to a binary classifier. The image-text (video-text) pairs serve as positive samples, and we randomly replace the image (video) in a data pair with another image (video) to build negative sample.

**Masked Language Modeling (MLM).** We adopt MLM following BERT [24], which conducts a classification on the vocabulary list to predict masked words. We randomly mask out 15% text tokens, and replace them with the [MASK] token, random words, or left unchanged, with the probability of 80%, 10% and 10%, respectively. The classification loss is as follows:

$$\mathcal{L}_{MLM} = \text{CE}(\phi(T_{mask}), y), \quad (8)$$

where  $T_{mask}$  is the output masked token feature,  $\phi$  serves as a classifier, and  $y$  is the original token ID.

The overall training objective of our model is:

$$\mathcal{L} = \mathcal{L}_{CL} + \mathcal{L}_{ITM} + \mathcal{L}_{MLM} + \mathcal{L}_{SCL}, \quad (9)$$

where  $\mathcal{L}_{SCL}$  is defined in Eq. (3).

## B. Experiments Details

### B.1. Pre-training Settings

In the image-text pre-training phase, we train the model for 100k steps totally using a batch size of 4096 on 64 NVIDIA A100 GPUs. We adopt the AdamW optimizer with a weight decay of 0.01. The learning rate of uni-modal encoders is warmed up from 0 to  $1e - 5$  in first 10% steps and then decayed linearly. The fusion transformer has a five times higher learning rate. As for the video-text pre-training, the model is trained for 10k steps with the same batch size. The maximal learning rate of uni-modal encoders is  $5e - 6$ , and other settings are similar to the first phase.

In terms of the model architecture, We utilize CLIP-ViT-224/16 [39] and RoBERTa [34] to initialize vision and language encoders following METER [9]. The fusion encoder consists of dual-stream cross-modal blocks of 6 layers, each with a hidden dimension of 768 and 12 heads in the multi-head attention. As for data pre-processing, the image size

is set to  $288 \times 288$  for pre-training and  $384 \times 384$  for fine-tuning, respectively. RandAugment [7] is applied for data augmentation. We resize each frame of video to  $224 \times 224$  and uniformly sample 4 frames as video input. Moreover, the maximum length of input text is 50. The temperature hyper-parameter  $\tau$  in Eq. (2) is set as 0.03.

### B.2. Downstream Tasks

**Visual Question Answering (VQA).** Given an image and its corresponding question, the model needs to understand visual and textual information simultaneously to predict the answer. We concatenate output [CLS] features of the image and question, and then conduct a classification on the candidates set of 3,129 answers.

**Visual Reasoning (NLVR2).** Given a pair of images and a description, the model is expected to reason whether their relationship is consistent. Specifically, this task is transformed to a binary classification problem.

**Image-Text Retrieval.** There are two sub-tasks: (1) using images as queries to retrieve texts (TR); (2) using texts as queries to retrieve images (IR). The recall ratio is employed as the evaluation metrics. We evaluate our model

on Flickr30K [38] and COCO [33]. Flickr30K contains 1K images and 5K texts for evaluation, and COCO includes 5K images and 25K texts. Generally, there are five correct captions for an image.

**Video-Text Retrieval.** Similar to exiting methods [10, 14, 18], we focus on text-to-video recall metrics. Our pre-trained model is evaluated on MSRVT [51] and LSDMC [40], which both contain 1K video-text pairs for testing.

### C. Visualization Cases

The proposed SCL encourages the global representations to learn global-to-local alignment, which implies that they have a more accurate attention distribution on local information of the other modality. To illustrate this, we show more visualization cases of [CLS] tokens’ attention maps in Fig. 6.

### D. Broader Impacts

Since our model predicts content based on learned statistics of pre-training datasets and we do not filter out possible inappropriate image- or video-text pairs (e.g., of violence and blood), our model may be used to retrieve unhealthy videos for spreading.

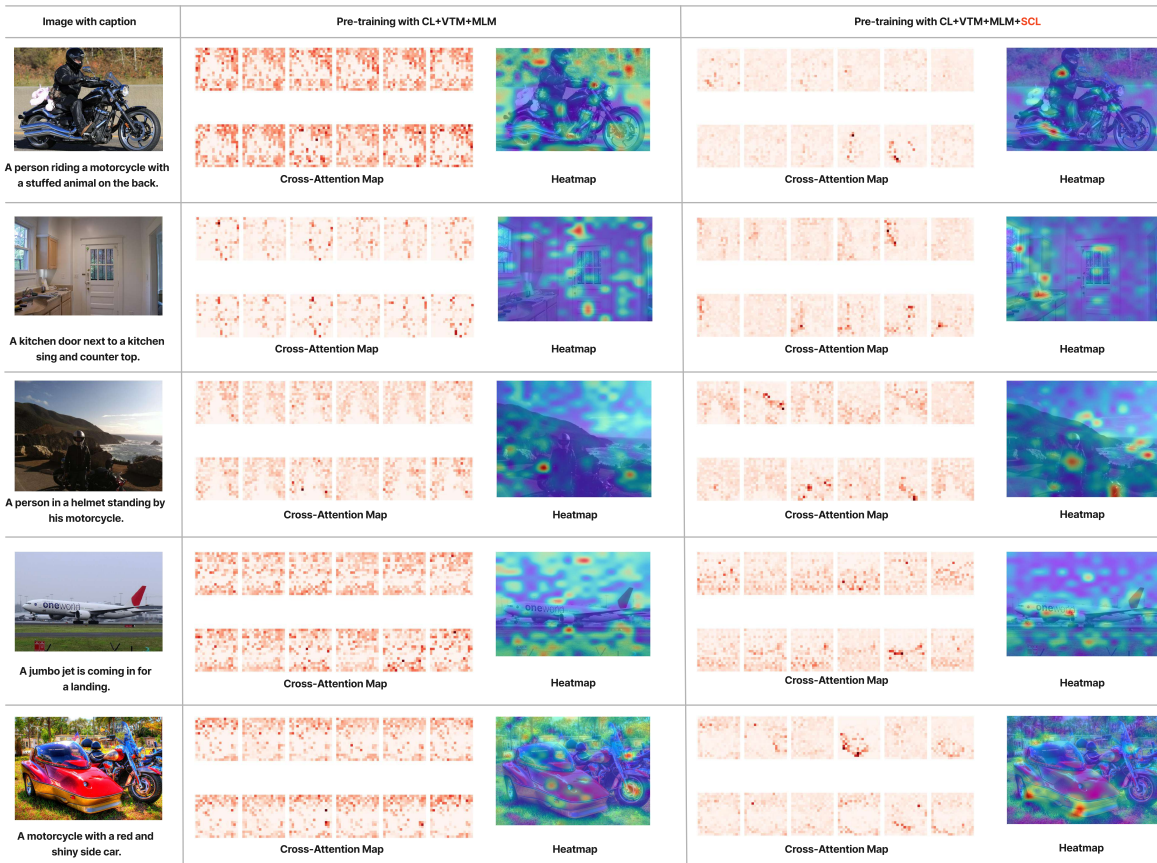

Figure 6. The cross-attention visualization of text [CLS] on the whole image for the model pre-trained with or without SCL.
